# Supplementary material
Source: publisher figshare collection journal article supplement (https://diabetesjournals.figshare.com/articles/dataset/_/27625659)
Supplement: Supplementary file 2 [file 2]

## Supplement 2 (online only)

Table 1. Correlations for Outcomes at Pretest (baseline)

| Outcome                                                | Correlations at Baseline (N=293) |        |         |      |      |       |      |       |     |
|--------------------------------------------------------|----------------------------------|--------|---------|------|------|-------|------|-------|-----|
|                                                        | EDDI                             | DEPS-R | DEBQ-RS | TIIS | BD   | PANAS | PAID | T1DAL | TIR |
| Eating disorder symptoms (EDDI)                        | 1                                |        |         |      |      |       |      |       |     |
| Diabetes-specific disordered eating behaviors (DEPS-R) | .63                              | 1      |         |      |      |       |      |       |     |
| Dietary Restraint (DEBQ-RS)                            | .44                              | .48    | 1       |      |      |       |      |       |     |
| Pursuit of the thin ideal (TIIS)                       | .17                              | .28    | .22     | 1    |      |       |      |       |     |
| Body dissatisfaction (BD)                              | .42                              | .48    | .36     | .25  | 1    |       |      |       |     |
| Negative affect (PANAS)                                | .49                              | .58    | .33     | .12  | .41  | 1     |      |       |     |
| Diabetes distress (PAID)                               | .43                              | .59    | .32     | .15  | .29  | .59   | 1    |       |     |
| Diabetes-related quality of life (T1DAL)               | -.32                             | -.51   | -.17    | -.11 | -.29 | -.53  | -.73 | 1     |     |
| Blood glucose time-in-range (TIR)                      | -.16                             | -.26   | .04     | .03  | -.08 | -.16  | -.28 | .26   | 1   |

Note: , EDDI: Eating Disorder Diagnostic Interview, DEPS-R: Diabetes Eating Problem Survey-Revised, DEBQ-RS: Dutch Eating Behavior Questionnaire – Restrained Scale, TIIS: Thin Ideal Internalization Scale, BD: The Satisfaction and Dissatisfaction with Body Parts Scale, PANAS: Positive And Negative Affect Schedule, PAID: Problem Areas In Diabetes, T1DAL: Type 1 Diabetes And Life, TIR: Time-In-Range.
